# Supplementary material for: Unsupervised inter-domain transformation for virtually stained high-resolution mid-infrared photoacoustic microscopy using explainable deep learning
Source: PubMed Central journal article supplement (PMC11685655; doi:10.1038/s41467-024-55262-2), 2024-12-30
Supplement: 41467_2024_55262_MOESM1_ESM.pdf [file 41467_2024_55262_MOESM1_ESM.pdf]

## Supplementary information for:

# Unsupervised inter-domain transformation for virtually stained high-resolution mid-infrared photoacoustic microscopy using explainable deep learning

Eunwoo Park<sup>1,2,§</sup>, Sampa Misra<sup>1,2,§</sup>, Dong Gyu Hwang<sup>2,3,§</sup>, Chiho Yoon<sup>2,4</sup>, Joongho Ahn<sup>2,4</sup>, Donggyu Kim<sup>1,2</sup>, Jinah Jang<sup>1,2,3,6,7,8,\*</sup>, and Chulhong Kim<sup>1,2,4,5,6,7,9,\*</sup>

<sup>1</sup>Department of Convergence IT Engineering, Pohang University of Science and Technology (POSTECH), Pohang, Republic of Korea

<sup>2</sup>Medical Device Innovation Center, Pohang University of Science and Technology (POSTECH), Pohang, Republic of Korea

<sup>3</sup>Center for 3D Organ Printing and Stem Cells, Pohang University of Science and Technology (POSTECH), Pohang, Republic of Korea

<sup>4</sup>Department of Electrical Engineering, Pohang University of Science and Technology (POSTECH), Pohang, Republic of Korea

<sup>5</sup>Opticho Inc., Pohang, Republic of Korea

<sup>6</sup>Department of Mechanical Engineering, Pohang University of Science and Technology (POSTECH), Pohang, Republic of Korea

<sup>7</sup>Department of Medical Science and Engineering, Pohang University of Science and Technology (POSTECH), Pohang, Republic of Korea

<sup>8</sup>Institute for Convergence Research and Education in Advanced Technology, Yonsei University, Seoul, Republic of Korea

<sup>9</sup>Graduate School of Artificial Intelligence, Pohang University of Science and Technology (POSTECH), Pohang, Republic of Korea

§These authors contributed equally to this work

\*Corresponding authors: Chulhong Kim ([chulhong@postech.edu](mailto:chulhong@postech.edu)) and Jinah Jang ([jinahjang@postech.ac.kr](mailto:jinahjang@postech.ac.kr))

## Table of contents

### Supplementary Notes

|                                                                  |    |
|------------------------------------------------------------------|----|
| Supplementary Note 1. Specifications of the MIR-PAM system ..... | 3  |
| Supplementary Note 2. XDL-MIR-PAM of living cells .....          | 11 |

### Supplementary Figures

|                                                                                                           |    |
|-----------------------------------------------------------------------------------------------------------|----|
| Supplementary Fig. 1. XDL-UIDT network architecture .....                                                 | 2  |
| Supplementary Fig. 2. Imaging performance of the MIR-PAM system .....                                     | 3  |
| Supplementary Fig. 3. XDL-IREN-generated images and salience masks according to the training epochs ..... | 4  |
| Supplementary Fig. 4. GradCAM heatmap in each transformer layer of the XDL-based generator .....          | 5  |
| Supplementary Fig. 5. Verification for the HR-MIR-PAM .....                                               | 6  |
| Supplementary Fig. 6. Visual comparison of frameworks by network combination .....                        | 7  |
| Supplementary Fig. 7. Biological feature extraction from XDL-MIR-PAM duplexed images .....                | 8  |
| Supplementary Fig. 8. Magnified images of XDL-UDIT .....                                                  | 9  |
| Supplementary Fig. 9. XDL-MIR-PAM of fibrotic HCFs .....                                                  | 10 |
| Supplementary Fig. 10. XDL-MIR-PAM of living HCFs .....                                                   | 12 |
| Supplementary Fig. 11. XDL-UIDT performance according to the noise variances .....                        | 13 |

### Supplementary Tables

|                                                                |    |
|----------------------------------------------------------------|----|
| Supplementary Table 1. Four-fold cross-validation result ..... | 14 |
|----------------------------------------------------------------|----|

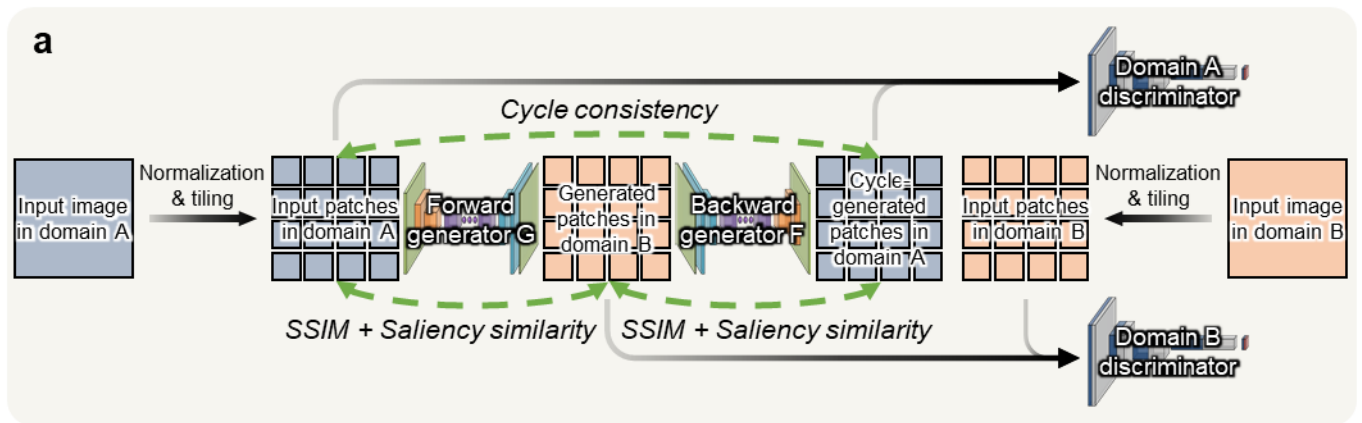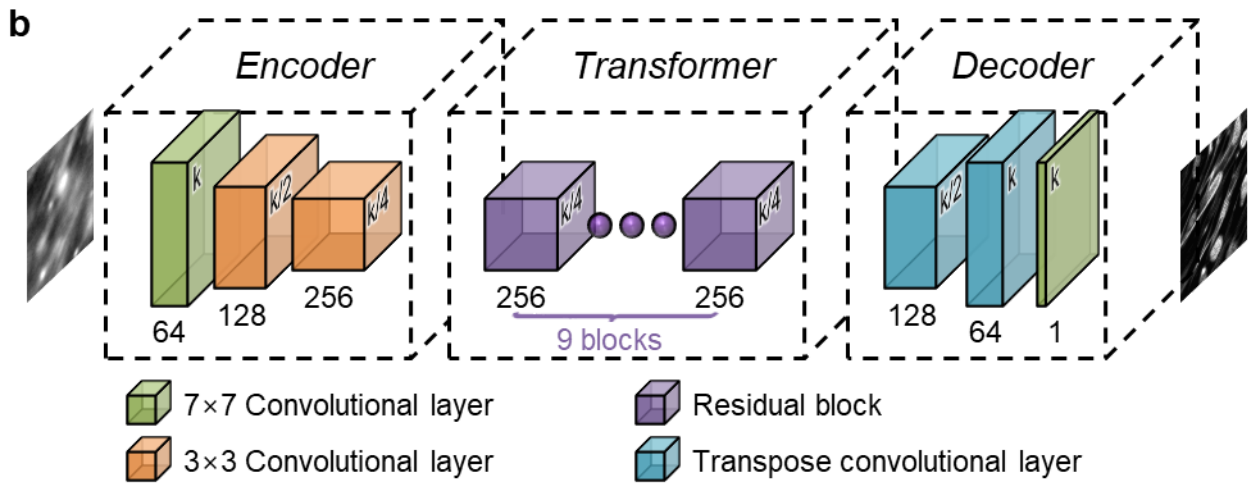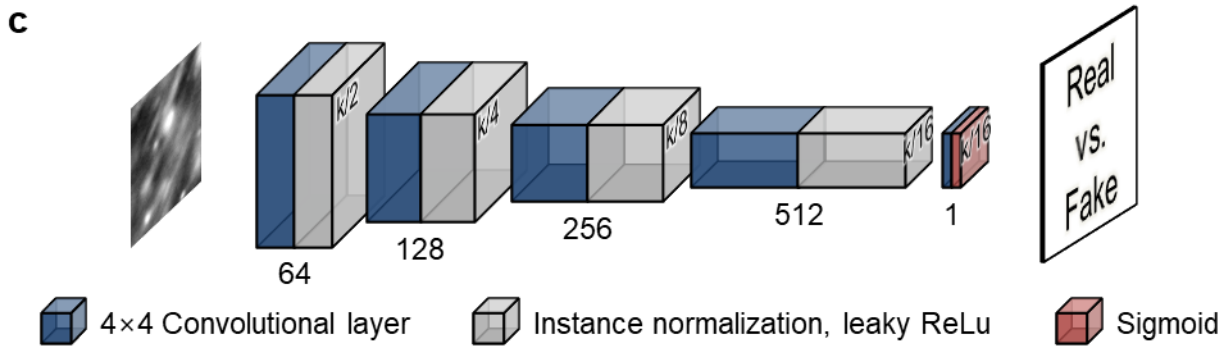

Supplementary Fig. 1 | XDL-UIDT network architecture. **a**, Schematic diagram of XDL-based CycleGAN. **b**, Generator. **c**, Discriminator.

## Supplementary Note 1 | Specifications of the MIR-PAM system

To evaluate the imaging performance of the MIR-PAM system, a 5  $\mu\text{m}$  wide gold pattern printed film was photoacoustically imaged in heavy water at a wavelength of 6.00  $\mu\text{m}$  to determine the spatial resolutions. The lateral resolution was measured to be 6.6  $\mu\text{m}$ , close to the theoretical value of 6.12  $\mu\text{m}$ . The axial resolution was measured to be 57.5  $\mu\text{m}$ , where the theoretical value is 55.2  $\mu\text{m}$  when the speed of sound in heavy water is assumed to be 1380  $\text{m/s}^{-1}$ . Both spatial resolution values were calculated by the full width at half maximum (FWHM) of each profile envelope. In addition, we found an imaging depth of 60.7  $\mu\text{m}$  at which the PA signal intensity diminished by -6 dB using a sloped surgical suture. The laser power irradiated to the sample was 0.2  $\text{mW}$ .

For HCF imaging (on day 7), the signal-to-noise ratio (SNR) and contrast-to-noise ratio (CNR) were 26.48 and 23.02, respectively. In detail, the peak-to-peak voltage levels of the signal, background, and noise were 27.8  $\text{mV}$ , 3.63  $\text{mV}$ , and 1.05  $\text{mV}$ , respectively (with 200 A-line averages).

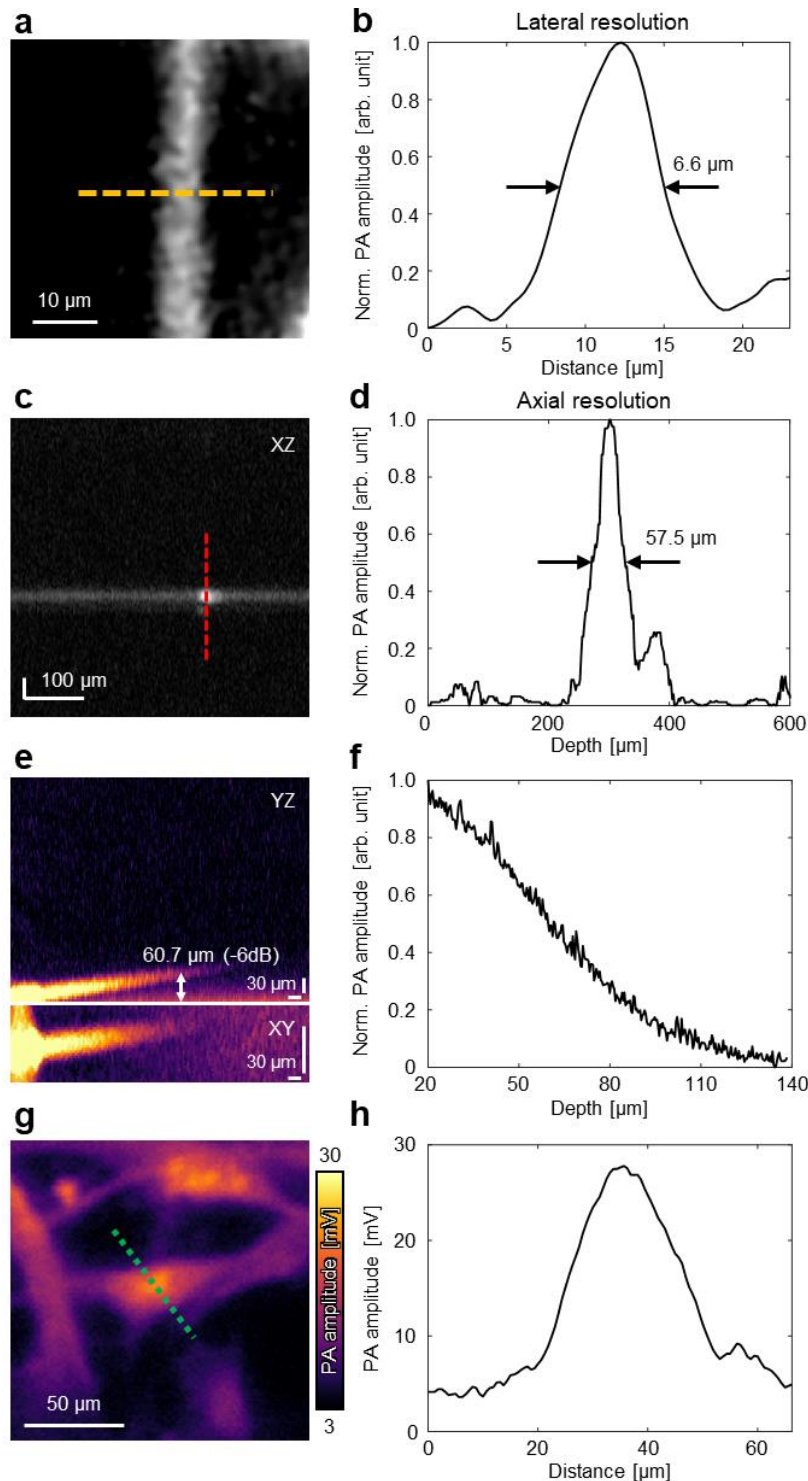

**Supplementary Fig. 2 | Imaging performance of MIR-PAM system.** **a**, PA maximum amplitude projection (MAP) image of a gold pattern printed film. **b**, Line profile along the orange line in **a** for the lateral resolution. **c**, B-scan PA image of a surgical suture. **d**, Line profile along a red line in **c** for the axial resolution. **e**, PA MAP images of a sloped surgical suture. **f**, Normalized PA signal amplitude along the central depth of the suture. **g**, PA MAP image of cultured HCF. **h**, PA line profile at the green dotted line in **g**. Source data are provided as a Source Data file.

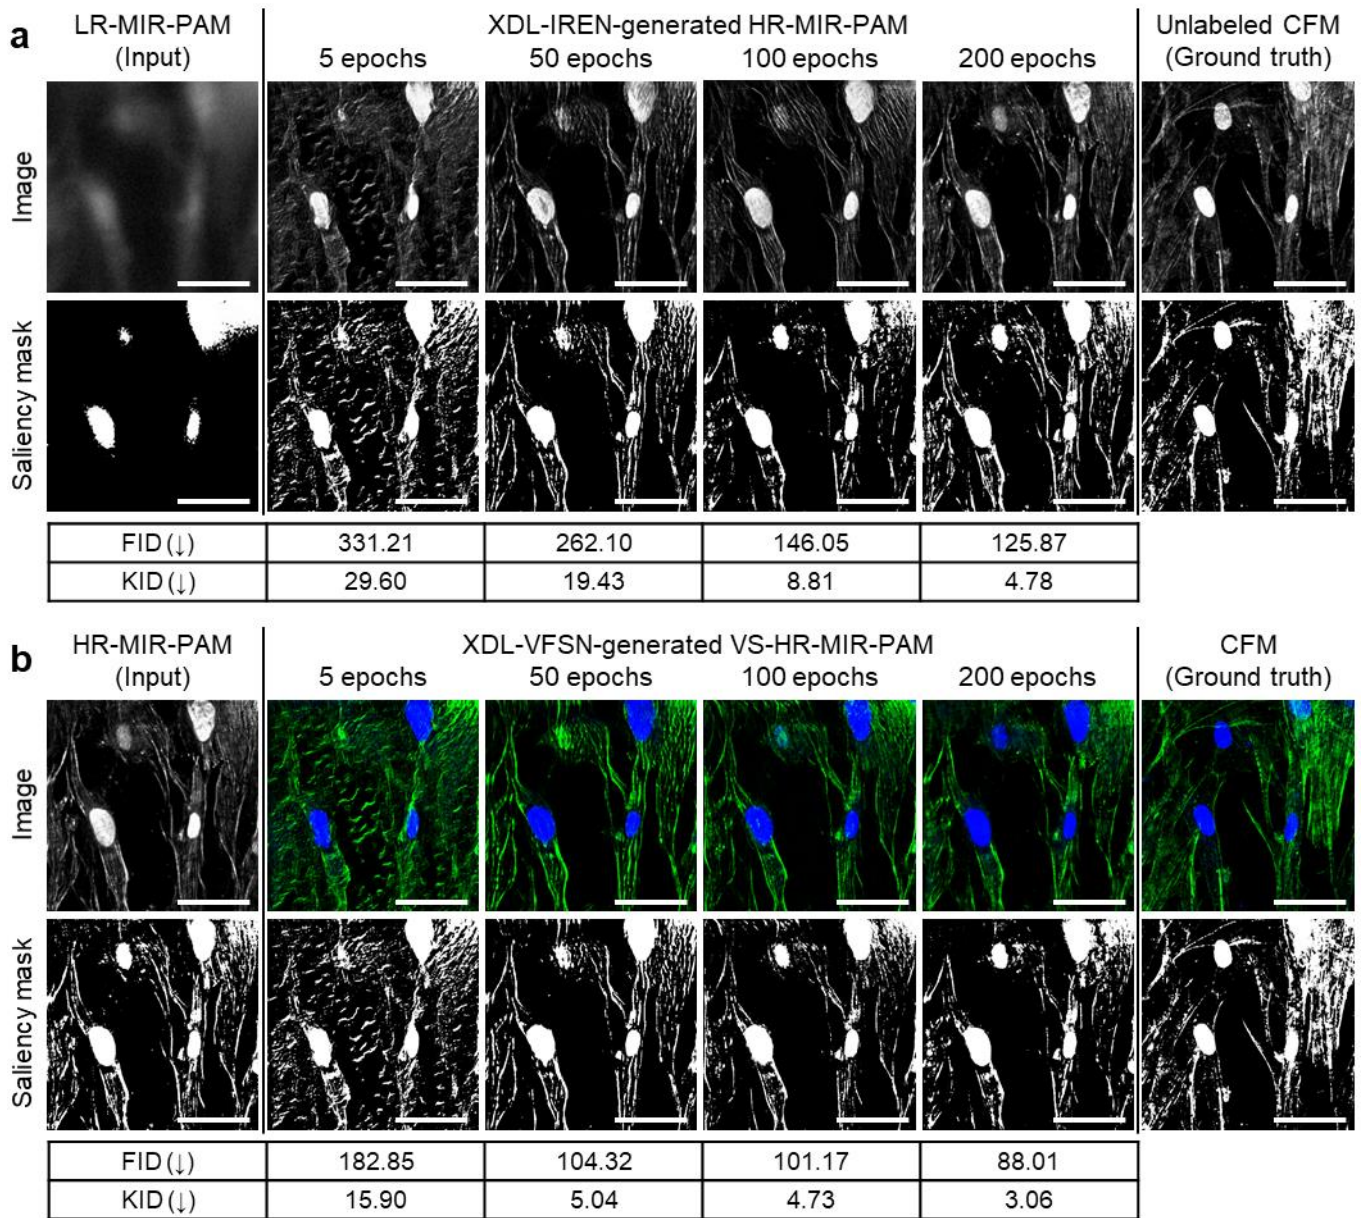

Supplementary Fig. 3 | XDL-generated images and saliency masks in a. IREN and b. VFSN according to the epochs. Scale bars, 50  $\mu\text{m}$ .



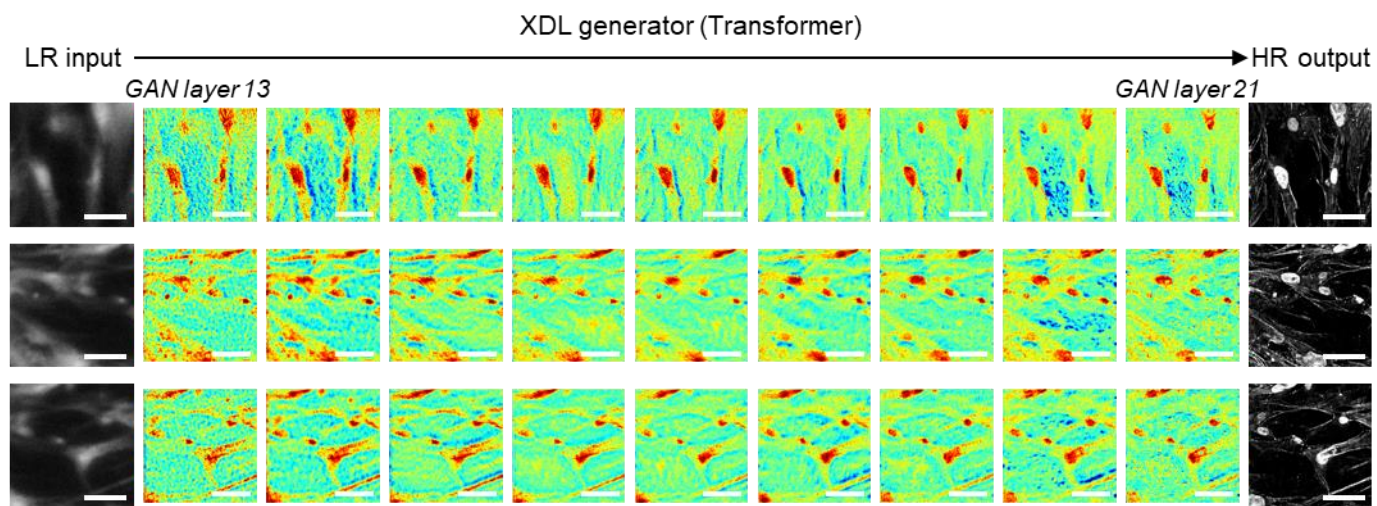

Supplementary Fig. 4 | GradCAM heatmap in each transformer layer of the XDL-based generator. Scale bars, 50  $\mu\text{m}$ .

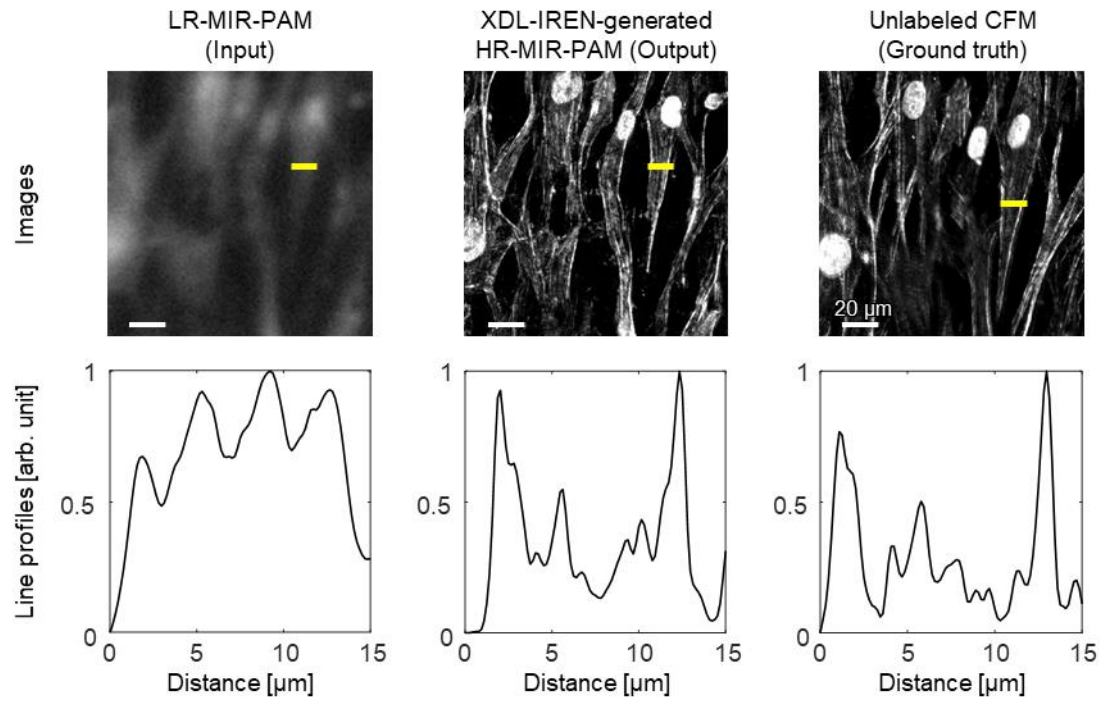

**Supplementary Fig. 5 | Verification for the HR-MIR-PAM.** For quantitative evaluation of the XDL-IREN, line profiles along the yellow lines of each corresponding image are compared. Scale bars, 20  $\mu\text{m}$ . The XDL-IREN-generated HR-MIR-PAM images capture detailed structures of HCF (1–2  $\mu\text{m}$ ) beyond the resolution of LR-MIR-PAM (6–7  $\mu\text{m}$ ). Source data are provided as a Source Data file.



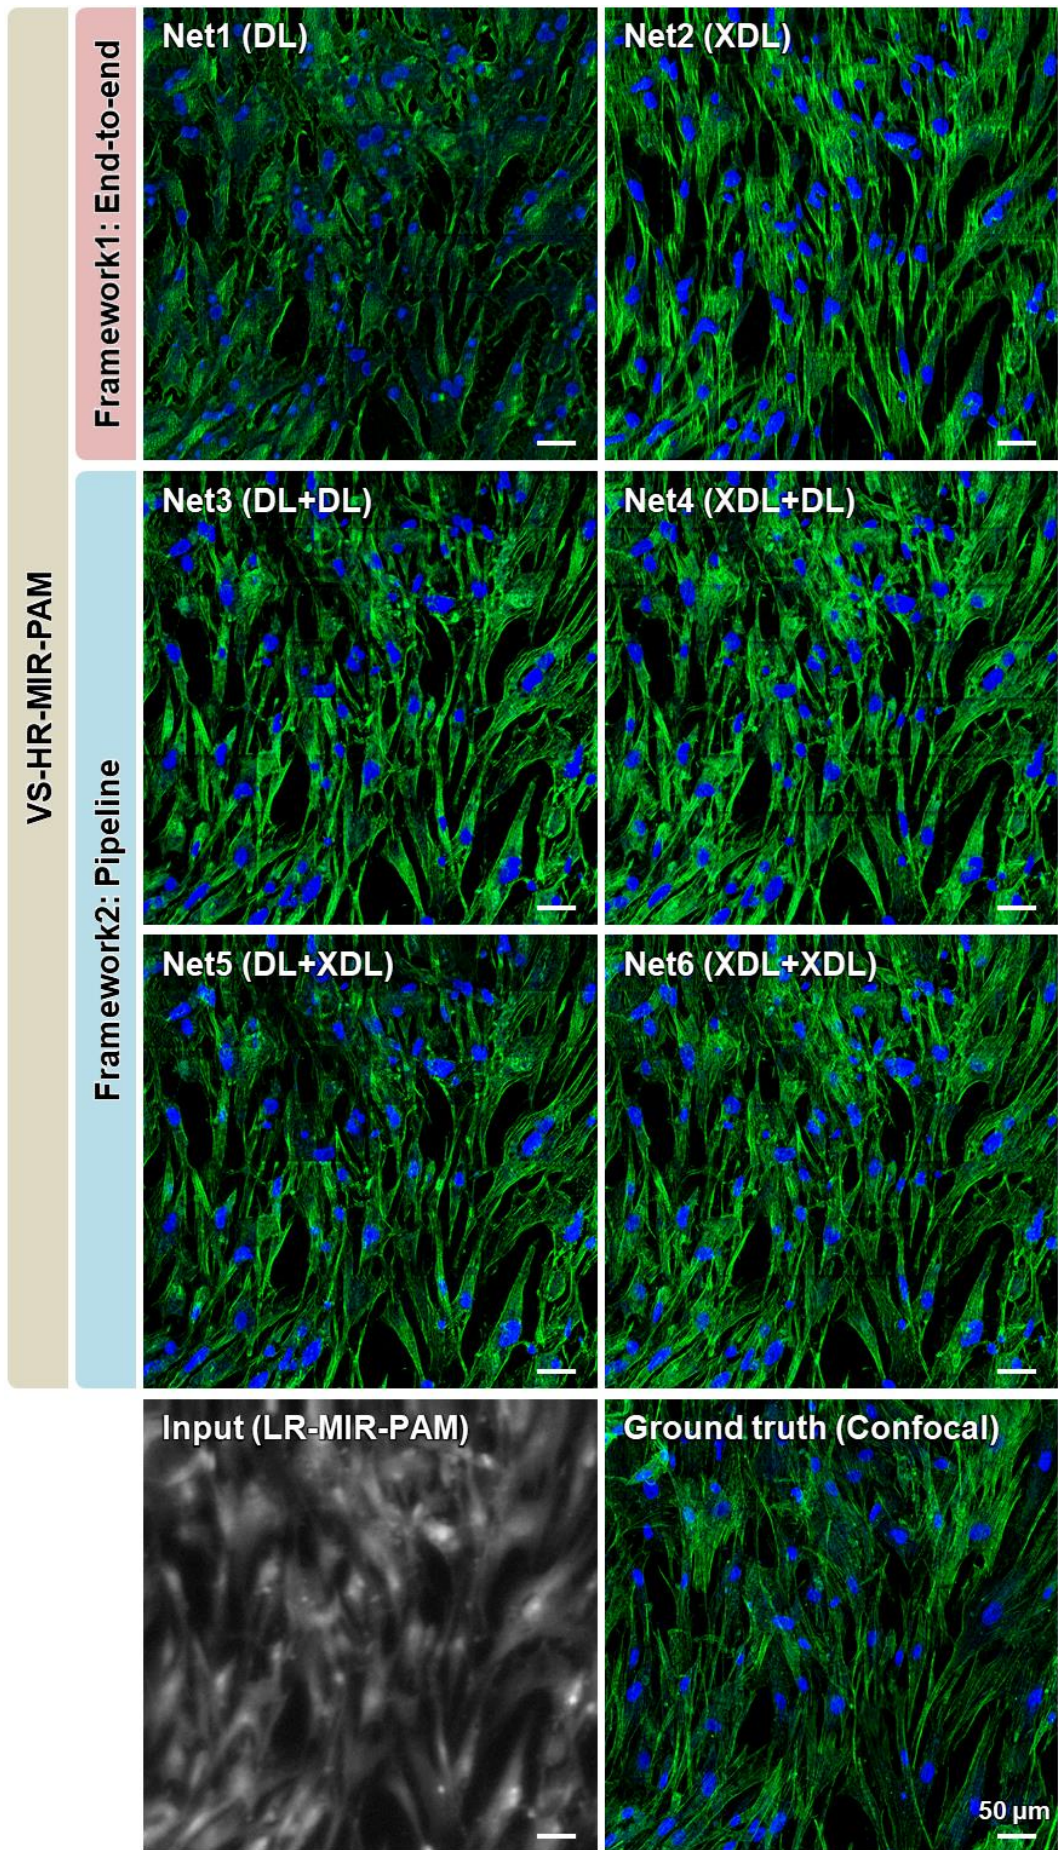

Supplementary Fig. 6 | Visual comparison of frameworks by network combination.

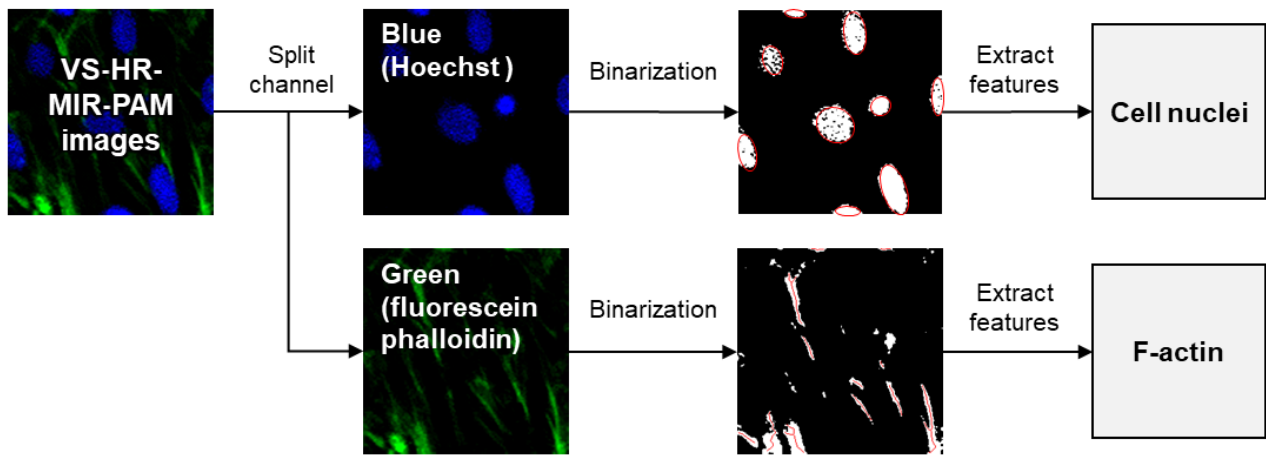

Supplementary Fig. 7 | Biological feature extraction from XDL-MIR-PAM duplexed images.



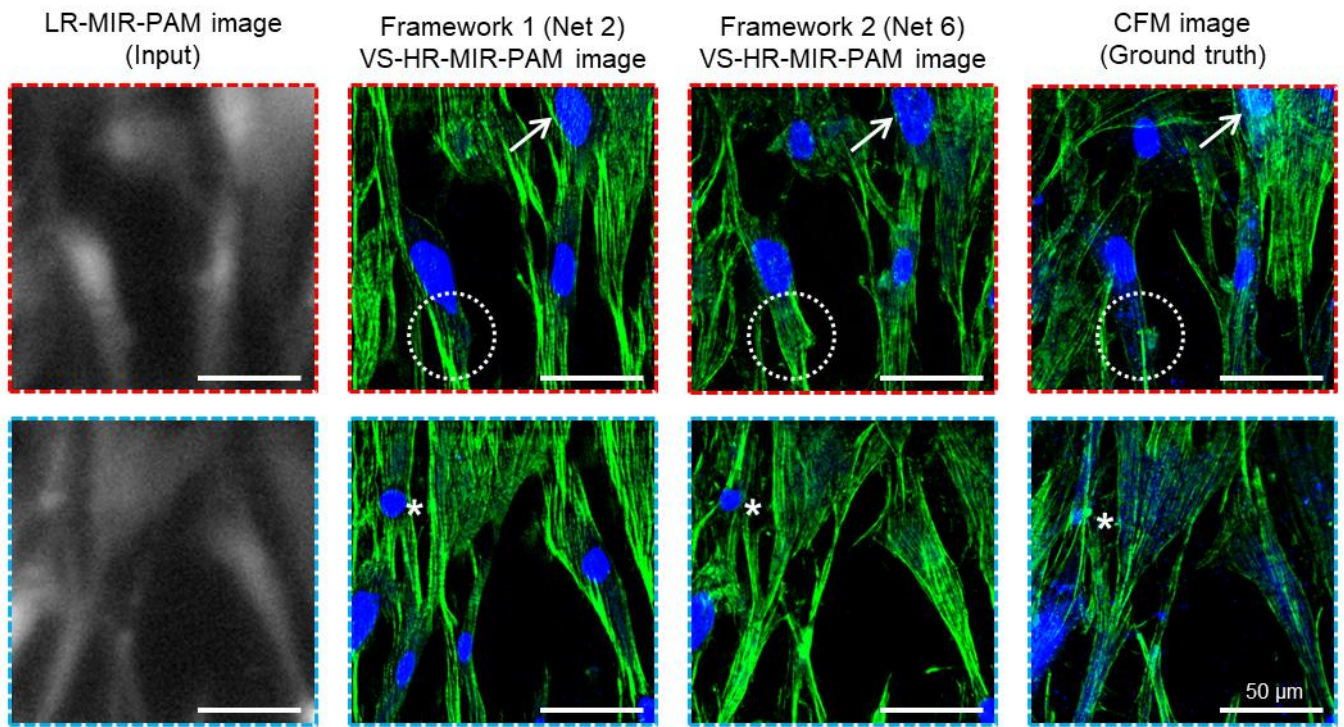

Supplementary Fig. 8 | Magnified images of XDL-UDIT. Scale bars, 50  $\mu\text{m}$ .

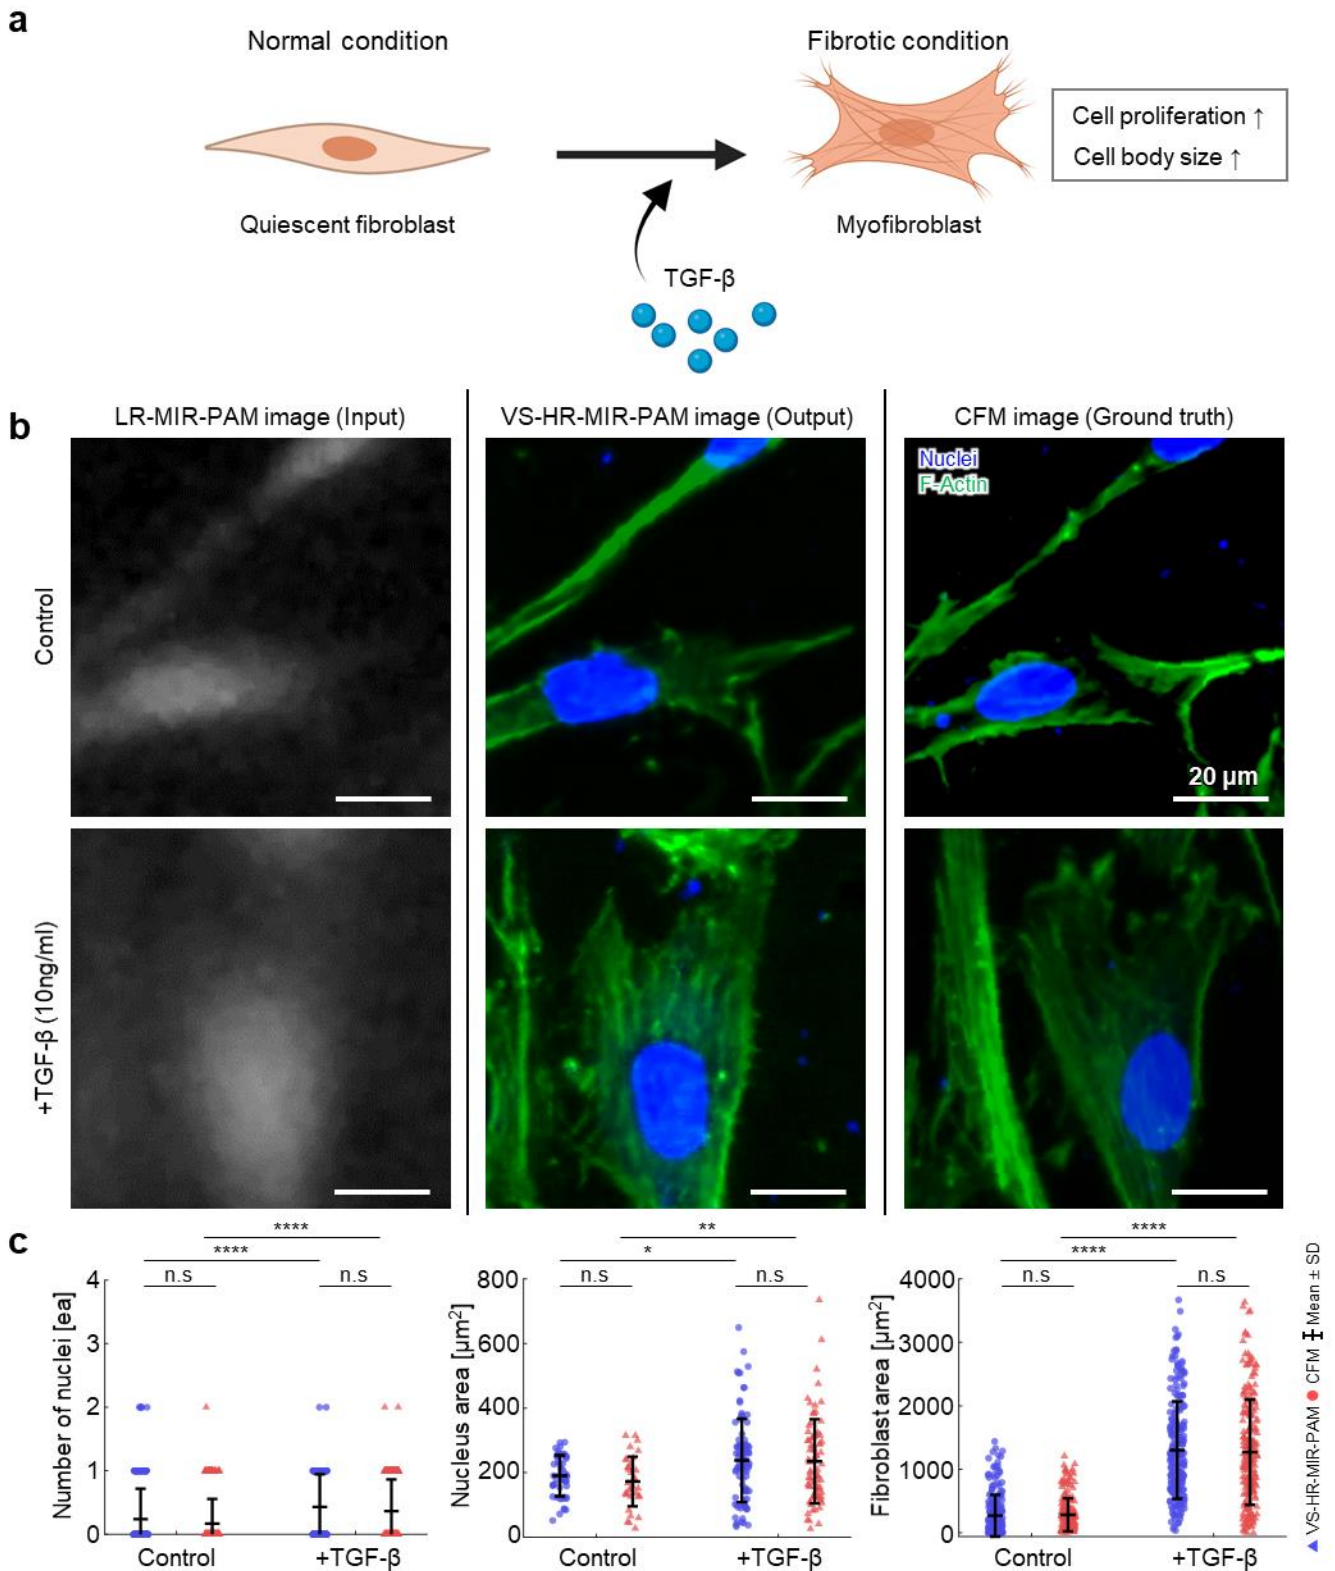

**Supplementary Fig. 9 | XDL-MIR-PAM imaging of fibrotic HCFs. a,** Conceptual schematic of activation. (Created in BioRender. Kim, M. (2024) <https://BioRender.com/j39a961>). **b,** Visual comparison of XDL-MIR-PAM images between the domains. Scale bars, 20  $\mu$ m. **c,** Comparisons of biological features according to cell growth: Number of nuclei, nucleus area, and fibroblast area ( $n = 225$ ). Significance by two-way ANOVA with uncorrected Fisher's LSD test: n.s, not significant ( $p > 0.05$ ), \*,  $p < 0.005$ , and \*\*\*\*,  $p < 0.0001$ . Source data and p-values are provided as a Source Data file.

## Supplementary Note 2 | XDL-MIR-PAM of living cells

While traditional CFMs have struggled with photobleaching and phototoxicity, XDL-MIR-PAM can overcome these problems by implementing resolution enhancement and virtual staining in label-free living cells. The feasibility of MIR live-cell imaging is confirmed by the cell viability under MIR laser irradiation <sup>2</sup>. In the same way as fixed cells, LR-MIR-PAM images and CFM images of HCF were used as the input and ground truth, respectively. Supplementary Fig. 8a depicts a strategy for the live-cell XDL-MIR-PAM. To generalize XDL-UIDT, both fixed and living cell image sets are included in the training dataset. In particular, only images of days 1 and 7 were trained and targeted to generate XDL-MIR-PAM images of living HCF on days 1, 4, and 7. We adopted the pipelined framework (Net 6) and tested it to generate the VS-HR-MIR-PAM images. Supplementary Fig. 8b shows the results of XDL-MIR-PAM of living cells according to HCF growth. On days 1, 4, and 7, LR-MIR-PAM images were obtained and VS-HR-MIR-PAM images were generated and compared with corresponding CFM images. The overall HCF confluency increases over the days. The F-actin structures that were indistinct and difficult to identify in the LR-MIR-PAM input images are predicted in detail and appear as fibers in the VS-HR-MIR-PAM images on all days. Supplementary Fig. 8c quantifies the change in the biological features. In the VS-HR-MIR-PAM images, the number and area of the cell nuclei do not vary significantly over the days. In contrast, the fibroblast area increases by 67.6% overall. It increased sharply to 42.2% in the early phase (day 1–4), and slowly to 17.8% in the late phase (day 4–7). These metrics show strong correlations ( $R^2 > 0.95$ ) with values in CFM. The XDL-MIR-PAM accurately predicts every stages of living cell growth.



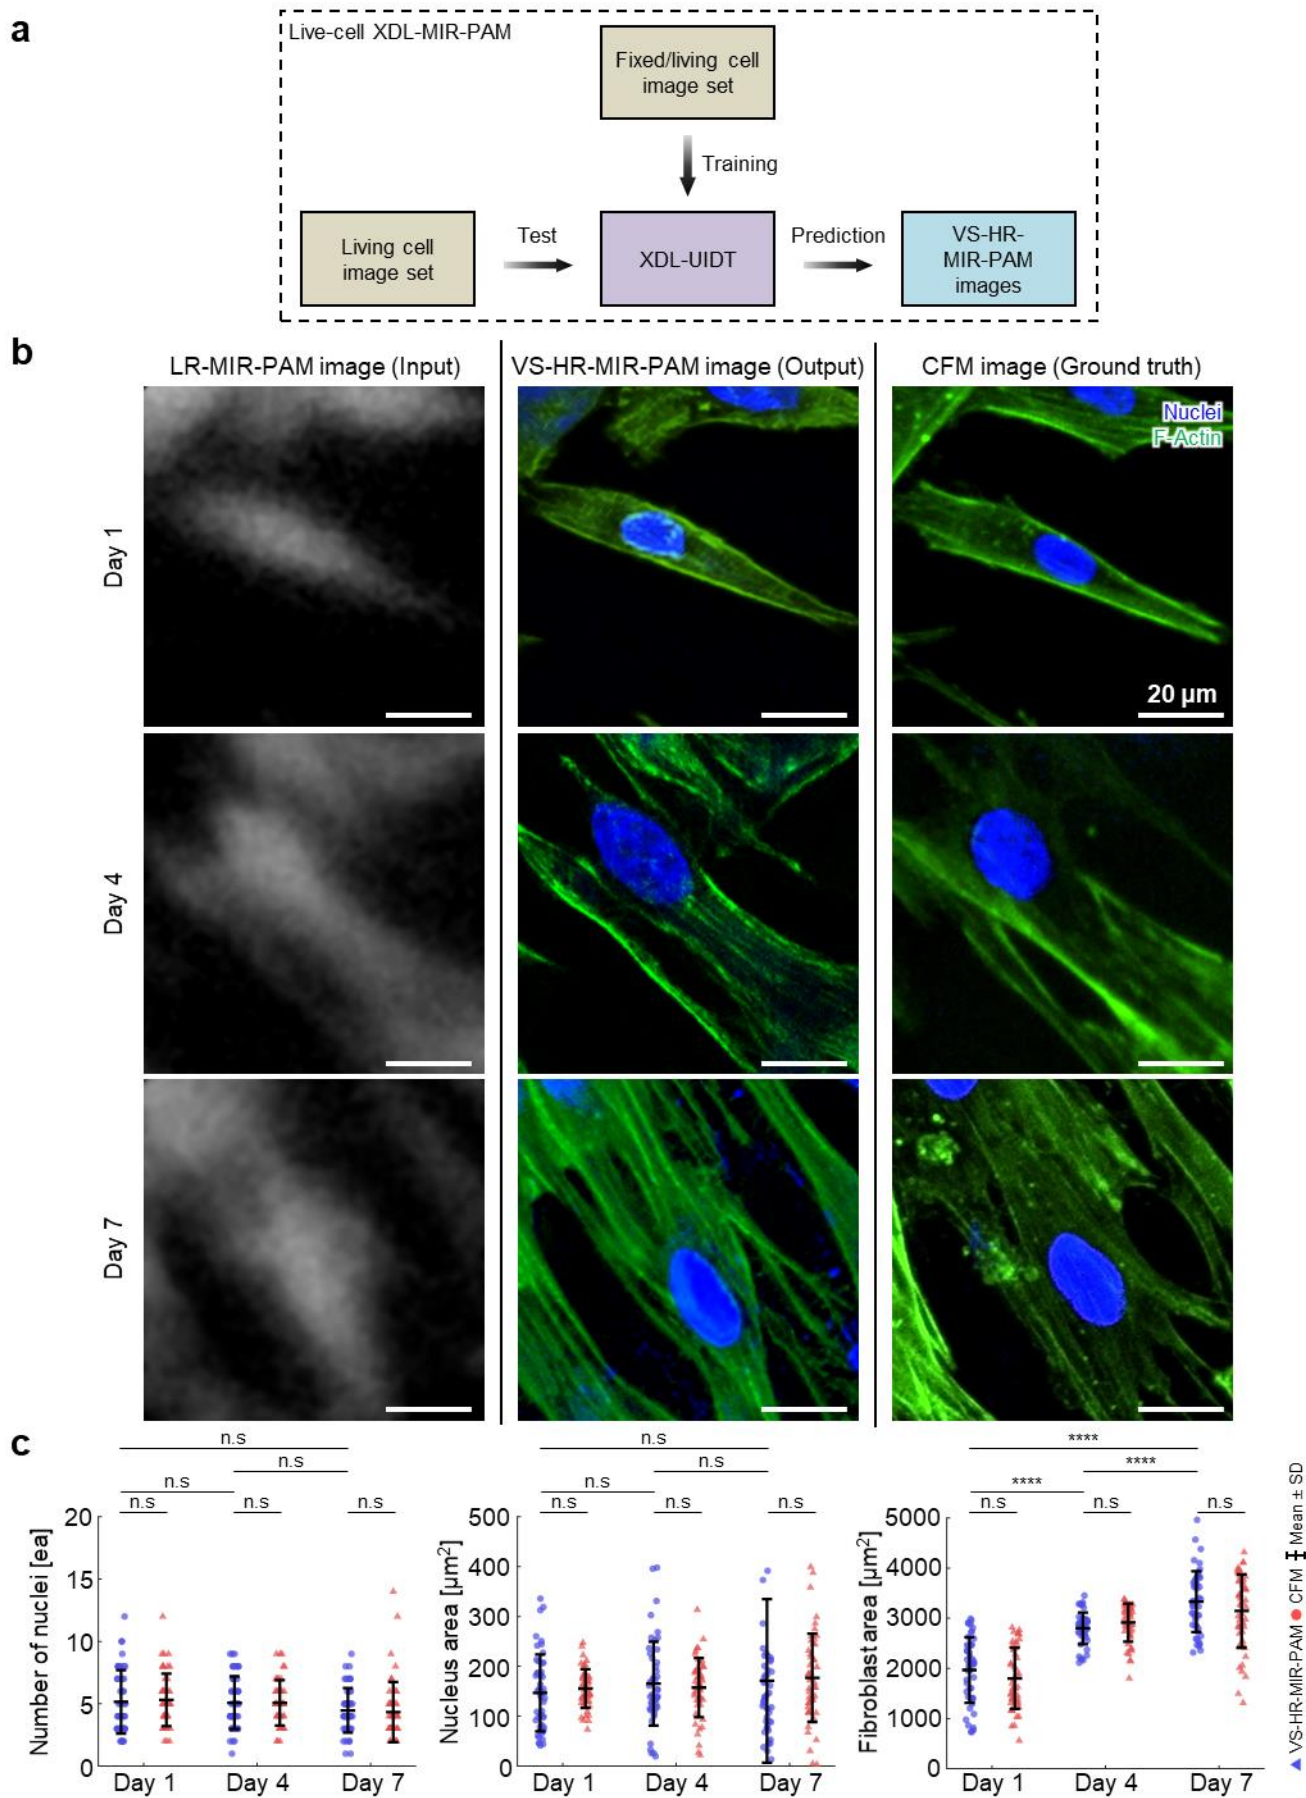

**Supplementary Fig. 10 | XDL-MIR-PAM imaging of living HCFs. a**, Conceptual workflow of live-cell XDL-MIR-PAM. **b**, Visual comparison of XDL-MIR-PAM images between the domains. Scale bars, 20  $\mu\text{m}$ . **c**, Comparisons of biological features according to cell growth: Number of nuclei, nucleus area, and fibroblast area ( $n = 49$ ). Significance by two-way ANOVA with Šidák's multiple comparisons test: n.s., not significant ( $p > 0.05$ ) and \*\*\*\*,  $p < 0.0001$ . Source data and p-values are provided as a Source Data file.

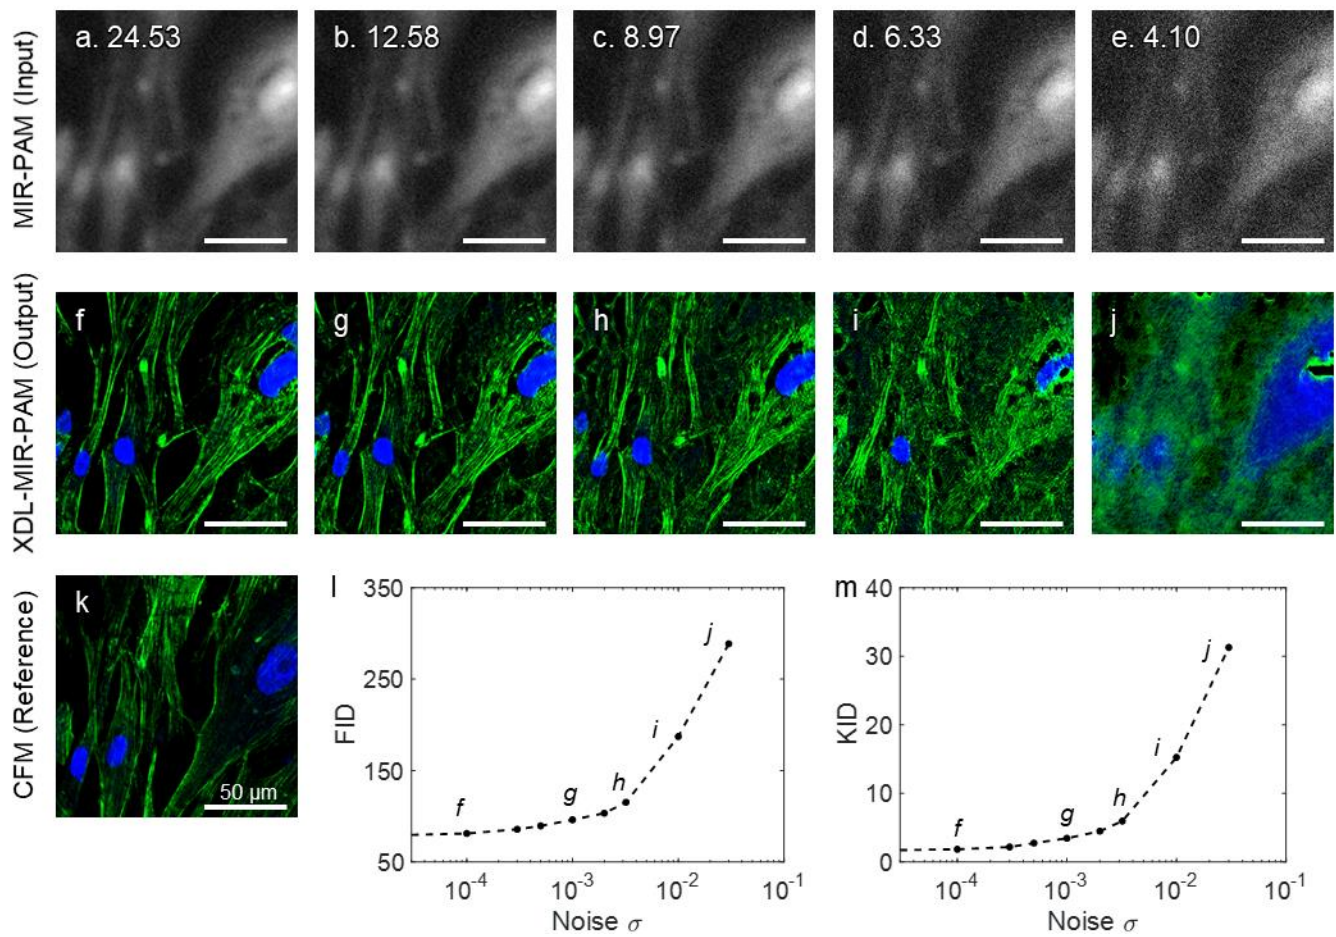

**Supplementary Table. 1 | Four-fold cross-validation result**

| Fold    | 1      | 2      | 3      | 4      | Mean   |
|---------|--------|--------|--------|--------|--------|
| FID (↓) | 100.43 | 106.81 | 100.87 | 105.45 | 103.39 |
| KID (↓) | 1.73   | 2.28   | 1.64   | 2.21   | 1.96   |



## Supplementary References

1. Chen, C.-T. & Millero, F. J. Speed of sound in deuterium oxide relative to normal water as a function of temperature and pressure. *Journal of the Acoustic Society of America* **62**, 553–557 (1977).
2. Pleitez, M.A. et al. Label-free metabolic imaging by mid-infrared optoacoustic microscopy in living cells. *Nature biotechnology* **38**, 293-296 (2020).
